1 **Whole-Exome sequencing identifies a Type 2 Diabetes candidate mutation in *PTPRF***

2 Running title: *PTPRF* and Type 2 Diabetes

3

4 Erik J.M. Toonen<sup>1</sup>, Michael Kwint<sup>2</sup>, Alexander Hoischen<sup>2</sup> and Cees J. Tack<sup>3</sup>

5

6 **Affiliations**

7 <sup>1</sup>R&D department, Hycult Biotech b.v., Fronstraat 2a, 5405 PB, Uden, The Netherlands

8 <sup>2</sup>Departments of Human Genetics and <sup>3</sup>Internal Medicine, Radboud University Medical

9 Center (Radboudumc), Geert Grooteplein Zuid 10, 6525 GA Nijmegen, The

10 Netherlands.

11

12 **Corresponding Author**

13 Cees J. Tack ([Cees.Tack@radboudumc.nl](mailto:Cees.Tack@radboudumc.nl)), Department of Internal Medicine, Radboud

14 University Medical Centre, P.O. Box 9101, 6500 HB Nijmegen, The Netherlands. Tel:

15 +31 24 3618819

16

17 **Funding**

18 E.T. was supported by an EFSD/Novo Nordisk research grant provided by the European

19 Foundation for the Study of Diabetes (EFSD) and by a grant of the Else-Kröner-

20 Fresenius-Stiftung.

21

22

23

24

NOTE: This preprint reports new research that has not been certified by peer review and should not be used to guide clinical practice.

25 **Author contributions**

26

27 ET: designed the study, performed the experiments, analyzed and interpreted the results,  
28 wrote the manuscript. MK: performed the experiments, analyzed and interpreted the  
29 results. AH: designed the study, analyzed and interpreted the results, revised the  
30 manuscript. CT: designed the study, analyzed and interpreted the results, revised the  
31 manuscript.

32

33 **Word count:** 3404 (excl. references)

34 **Abstract**

35

36 **Objectives:** Identification of genetic factors involved in Type 2 diabetes mellitus  
37 (T2DM) has been challenging. While genome-wide association studies (GWAS) have  
38 identified over 60 loci associated with T2DM, these variants only explain a small  
39 proportion of the total heritability of the disease. Whole-exome sequencing has become  
40 a powerful approach to identify genetic variants that are not captured by GWAS. We  
41 applied exome sequencing to identify causal genetic variants in a family with a 2-  
42 generation history of T2DM characterized by substantial insulin resistance, hypertension  
43 and isolated hypertriglyceridemia. **Methods:** Exome sequencing was performed on  
44 genomic DNA of two affected family members. Twenty-four identified variants that were  
45 present in both family members were further tested for segregation in all other family  
46 members by Sanger sequencing. **Results:** Three rare missense variants, located in the  
47 genes *PTPRF*, *FUCA1* and *FBXO30*, were present in all affected family members but  
48 also in one unaffected family member. Protein-protein interaction analysis showed that  
49 *PTPRF* strongly interacts with several members of the insulin signaling pathway.

50 **Conclusions:** Our results suggest that the variant in the *PTPRF* gene might be causal for  
51 an unusual T2DM subtype that is characterized by a severe insulin resistance and isolated  
52 hypertriglyceridemia.

53

54 **Keywords:** Whole-exome sequencing, Insulin resistance, Genetics of Type 2 Diabetes,  
55 Hypertriglyceridemia, Rare genetic variants.

## 56 **Introduction**

57

58 Type 2 diabetes mellitus (T2DM) is a complex multifactorial trait where both  
59 environmental and genetic factors contribute to the pathogenesis of the disease. Based on  
60 twin and segregation studies, the heritability of type 2 diabetes has been estimated to be  
61 between 36 and 83 percent [1, 2]. Large-scale genome-wide association studies (GWAS)  
62 have contributed towards understanding the inherited basis of diabetes. In the past few  
63 years, GWA studies have identified over numerous loci associated with T2DM [3-7].  
64 However, these identified genetic variants account for less than 6 percent of the  
65 heritability estimated from family studies [8]. Because these common variants explain  
66 only a small fraction of the estimated heritability, it has been hypothesized that rare  
67 genetic variants with large effect sizes contribute to the genetic predisposition of T2DM.  
68 Traditional genotyping platforms used in GWAS are primarily designed to capture  
69 common genetic polymorphisms but offer poor coverage of rare genetic variants, hence  
70 rare disease variants with large effect sizes are easily missed [9]. Approaches other than  
71 GWAS are necessary to identify the remaining genetic variants underlying the  
72 pathogenesis of type 2 diabetes in order to improve diagnosis and treatment strategies.

73       Recently, whole-exome sequencing has become a powerful strategy to identify  
74 low-frequency and rare variants not captured by GWAS [10]. Sequencing of all genes  
75 (exome) is an approach relying on the hypothesis that functional disease-associated  
76 variation resides in the coding regions. Whole-exome sequencing has proven to be  
77 valuable for identifying mutations responsible for monogenic diseases [11] and emerging  
78 reports show that exome sequencing can also be applied to uncover variation associated  
79 with complex human traits [12, 13]. While T2DM consists of both decreased insulin

80 secretion and reduced insulin action (insulin resistance), most genetic defects identified  
81 so far relate to insulin secretion and genetic factors in obesity-induced insulin resistance  
82 seem to be underreported [14].

83 In the present study, we apply exome sequencing to identify genetic variants that  
84 may have a role in disease susceptibility in a family with a 2-generation history of type 2  
85 diabetes, with an unusual phenotype characterized by pronounced insulin resistance and  
86 hypertriglyceridemia.

87 **Methods**

88

89 *Family members*

90 We recruited a family with a 2-generation family history of T2DM . The index cases were  
91 under chronic diabetes care in the hospital. Due to privacy reasons, the pedigree is not  
92 published, please contact the corresponding author for further information.

93

94 *Case presentations*

95 The index case presented with diabetes in his late thirties with a six months period of  
96 weight loss (14 kg) and balanitis. Body weight at presentation 80.5 kg, height 1.73 (BMI  
97 26.7 kg/m<sup>2</sup>), blood pressure 150/100. Laboratory analysis revealed HbA<sub>1c</sub> 12.5%, ALAT  
98 slightly elevated, urine ketones negative. Patient started oral combination therapy (SU  
99 and metformin), with temporary improvement, but secondary glycemc failure after  
100 approximately 2 years. Before start of insulin his laboratory parameters were: HbA<sub>1c</sub>:  
101 9.2%, total cholesterol 5.3, Triglycerides 4.9, HDL-cholesterol 0.70, LDL 2.51 mmol/L  
102 (all fasting and without statin), fasting insulin level: 30 mU/L, C-peptide: 1.54 nmol/L,  
103 ASAT 21, ALAT 39, urine albumin 20 mg/L. Patient was started on insulin, eventually  
104 administered by pump, up to 140 U/day (body weight increased to 94 kg, BMI 31.4  
105 kg/m<sup>2</sup>). His triglyceride levels remained elevated. See Table 1 for details.

106 A relative was diagnosed with diabetes in his sixties during routine medical examination.  
107 He was overweight (weight 87.5 kg, height 1.78, BMI 27,6 kg/m<sup>2</sup>) and had hypertension,  
108 micro-albuminuria, hypertriglyceridemia and low HDL-cholesterol. He was eventually  
109 treated with insulin, up to 160 U/day. He always had elevated triglyceride levels.

110 The clinical phenotype of affected family members was characterized by substantial  
111 insulin resistance, hypertension and hypertriglyceridemia without hypercholesterolemia.  
112 Data from one affected relative were retrieved from another hospital. Data from an  
113 unaffected relatives were obtained during a short hospital visit, data from one unaffected  
114 relative were obtained through his GP and by telephone. In family members with diabetes,  
115 detailed information regarding onset of diabetes, complications and treatment was  
116 obtained. In unaffected family members, BMI and blood pressure was measured and  
117 fasting glucose, and HbA1c (to exclude diabetes) and lipids levels were measured. Results  
118 are depicted in Table 1. There was no information suggesting consanguineous marriage  
119 in the family.

120

#### 121 *Non-related diabetes subjects*

122 To validate our initial results obtained from the analysis of the family members, we  
123 selected 24 non-related subjects who matched the characteristics of the affected family  
124 members (insulin > 1U/kg or >100 U/day; TG > 1,5 mmol/l; BMI < 35 kg m<sup>2</sup>). Subjects  
125 were selected from the Diabetes Pearl patient cohort. This cohort is a large, well-  
126 characterized observational cohort of type 2 diabetes patients. The Diabetes Pearl cohort  
127 is a collaborative biobank initiative from the Dutch University Medical Centers  
128 ([www.parelsnoer.org](http://www.parelsnoer.org)) [15]. DNA samples were retrieved from the Biobank after approval  
129 of the ethics committee.

130

#### 131 *Whole-Exome sequencing*

132 Exome sequencing was essentially performed as described previously [16, 17]. In brief,  
133 exome enrichment was performed using the SureSelect Human Exon 50-Mb Kit (Agilent,

134 Santa Clara, CA, USA), covering approximately 22,000 genes, followed by SOLiD4  
135 sequencing (Life Technologies, Carlsbad, CA, USA). Reads were mapped to the hg19  
136 reference genome using SOLiD LifeScope software version 2.1. All nonsynonymous  
137 variants shared in both affected individuals and absent or with very low frequency (0.1%)  
138 in dbSNP, were further investigated in healthy and affected family members.

139

#### 140 *Sanger Sequencing*

141 Nonsynonymous variants identified by exome sequencing were tested in healthy and  
142 affected family members for co-segregation by traditional Sanger sequencing. Forward  
143 and reverse PCR primers for each exon in which the variant was located were selected in  
144 an intronic sequence 50 bp away from the intron/exon boundaries. Unique primers were  
145 designed using the Primer3 software. PCR products were verified on 2% agarose gel,  
146 purified using ExoSAP-IT (Affymetrix, Santa Clara, CA, USA) and analyzed on  
147 ABI3730 genetic analyzers (Life Technologies, Carlsbad, CA, USA).

148

#### 149 *Ion torrent library preparation and sequencing*

150 All 32 coding exons of the *PTPRF* gene were analyzed in 24 unrelated diabetes patients  
151 who matched the clinical characteristics of the affected family members. The screening  
152 of 24 patients for variants in the *PTPRT* gene was carried out by using an Amplicon-based  
153 deep-sequencing approach on the Ion PGM sequencer (Life Technologies, Carlsbad, CA,  
154 USA). PCR amplicons were generated per sample using standard PCR protocols. Primer  
155 sequences are available upon request. PCR products per sample were pooled, and  
156 subsequently sheared to 200-bp fragments by the use of Covaris E210 (Covaris Inc.).  
157 Library preparation was performed using the Ion Xpress™ Plus Fragment Library Kit in



158 combination with the Ion Xpress Barcode adapters 1-96 kit. Emulsion PCR and  
159 enrichment were carried out on the Ion OneTouch System using the Ion PGM  
160 TemplateOT2 200 Kit as described by the manufacturer. Sequencing was performed  
161 using the 200bp kitv2, with Ion Sphere particles loaded to an Ion318™ chip (Life  
162 Technologies Carlsbad, CA, USA). Raw sequencing reads were mapped to the hg19  
163 genome using the Torrent Server with the use of the Torrent suite software. FASTQ files  
164 were subsequently analyzed and visualized in SeqNext (JSI Medical systems).

165

#### 166 *Protein-protein interaction analysis*

167 Protein-protein interactions (PPI) were identified using the STRING database (STRING  
168 v9.1; <http://string-db.org/>) [18]. STRING builds functional protein association networks  
169 based on compiled available experimental evidence. A confidence score is assigned to  
170 each identified protein–protein association and this score will increase when an  
171 association is supported by several types of evidence. In this study, only PPI are shown  
172 that yielded a high confidence score ( $\geq 0.7$ ).

173

#### 174 *Ethics*

175 All family members were informed about the goal of the study and consented to  
176 participation.

177

178

179

180

181

182 **Results**

183

184 *Characteristics of family members*

185 Characteristics of affected and unaffected family members are shown in Table 1.

186

187 *Whole-Exome sequencing identifies variants within the PTPRF and ASXL1 genes*

188 Exome sequencing was performed on genomic DNA of two family members with an  
189 average 46- and 81-fold coverage leading to 85.2% and 87.9% of the exome with at least  
190 10-fold coverage, respectively. We identified 38,067 and 39,293 genetic variants per  
191 proband in the two family members, respectively. Variants were annotated by a  
192 bioinformatics pipeline as previously described [16]. In addition, the variant had to be  
193 present in at least 20-80% of all reads suggestive of heterozygous changes in a dominant  
194 model of disease. Subsequently, genetic variants were prioritized based on predicted  
195 amino acid consequences and overlap with common genetic variants (listed in dbSNP  
196 version 135 and/or present in an in-house database containing >10,000 analyzed exomes  
197 of predominantly European ancestry). All filter steps are shown in Supplementary Table  
198 1.

199 We identified 21 unique non-synonymous variants present in both affected family  
200 members that were present in genes with known expression in adipose tissue (Table 2,  
201 Supplementary Table 1). All 21 variants were tested for segregation in all other family  
202 members by Sanger sequencing (Table 3). Two rare missense variants were present in all  
203 affected family members but also in one unaffected family member. Variants c.3614A>G  
204 (rs200885607; p.(N11965S); located in the gene *Protein tyrosine phosphatase, receptor*  
205 *type F (PTPRF; NM\_002840)*) and c.904C>T p.(R302C); located in the gene *ASXL*

206 *transcriptional regulator 1 (ASXLI; NM\_015338)* were also present in the non-affected  
207 family member II/4 (Table 3). The c.3614A>G variant within *PTPRF* was detected once  
208 in the in genome-wide sequence data from the 1000 Genomes Project which include the  
209 genomes of 1088 people (or 2176 chromosomes) [19]. The variant was present at very  
210 low frequency in public exome datasets, e.g. ExAc browser frequency 12/121398 alleles,  
211 i.e. allele frequency of  $9.885 \times 10^{-5}$ ; with 7/66730 alleles in Non-Finish Europeans  
212 (0.0001049 allele frequency) (<http://exac.broadinstitute.org/> [August 2019]) and also with  
213 very low allele frequency in the in-house exome database (0.00045 in > 8000 exomes).  
214 The *ASXLI* variant was never observed in ExAc nor in the in-house database. *In silico*  
215 predictions for both variants can be seen in Supplementary Table 2.

216

217 *PTPRF strongly interacts with proteins involved in insulin signaling.*

218 To investigate/identify in which biological processes and pathways the genes *PTPRF* and  
219 *ASXLI* are involved, we used the STRING database to search for predicted and published  
220 protein-protein interactions. Analysis showed that *PTPRF* strongly interacts with several  
221 members of the insulin signaling pathway. High confidence scores were assigned to the  
222 interactions between *PTPRF* and *Insulin receptor (INSR)* and *Insulin receptor substrate*  
223 *1 and 2 (IRS1 and 2)* (Table 4, Figure 1A). Indeed, *PTPRF* was demonstrated to be  
224 expressed in several insulin sensitive tissues where it interacts with the insulin receptor  
225 and dephosphorylates its tyrosine-kinase domain, thereby inhibiting its activation and  
226 downstream signaling [20]. These results point out to an important role for *PTPRF* in  
227 insulin signaling. Protein-protein interaction analysis also revealed that *ASXLI* did not  
228 interact with proteins involved in insulin signaling, glucose metabolism or other

229 biological processes that are likely to play a role in the pathogenesis of type 2 diabetes  
230 (Table 4 and Figure 1B).

231

### 232 *Investigation of the PTPRF gene in an additional cohort of T2DM patients*

233 The results described above clearly pointed out to *PTPRF* as a strong candidate gene for  
234 this T2DM phenotype. To validate our results, we investigated the *PTPRF* gene for the  
235 possible presence of genetic variants in an additional cohort of 24 unrelated T2DM  
236 patients. These patients were selected based upon disease characteristics that matched the  
237 characteristics of the affected family members (insulin > 1U/kg or 100 U/day; TG > 1,5  
238 mmol/l; BMI < 35 kg m<sup>2</sup>). All coding exons of the *PTPRF* gene were sequenced in these  
239 24 patients by the use of Ion torrent sequencing. The c.3614A>G variant was not present  
240 in these 24 patients. Also no additional rare variants were detected in this cohort.

241

## 242 **Discussion**

243

244 In the present study, we applied whole-exome sequencing to identify genetic variants  
245 possibly involved in disease susceptibility in a family with T2DM, characterized by  
246 substantial insulin resistance, hypertension and hypertriglyceridemia in the absence of  
247 hypercholesterolemia. We identified the rare variant c.3614A>G, located within the *PTPRF*  
248 gene, as a novel candidate susceptibility variant. Sequencing of all coding exons of the  
249 *PTPRF* gene in a cohort of 24 non-related T2DM patients did not reveal any additional  
250 variants. Our results suggest that the c.3614A>G variant might play a role in an unusual  
251 T2DM subtype that is characterized by a severe insulin resistance and “isolated”  
252 hypertriglyceridemia. Identification of genetic variants responsible for specific forms of

253 diabetes provide new insights regarding underlying disease aetiology. These new insights  
254 may help to improve diagnosis and to optimize treatment strategies in these specific  
255 T2DM subtypes.

256         The c.3614A>G variant was detected in all affected family members but also in  
257 one unaffected family member . Although this family member was not diagnosed with  
258 type 2 diabetes, his triglyceride levels were elevated. All family members with diabetes  
259 had episodes with grossly elevated TG levels (>10 mmol/L), fairly independent of age,  
260 but occasionally also showed less elevated TG levels. TG level was, however, always  
261 above the normal range. TG level in the genetically affected family member without  
262 diabetes was moderately elevated in one single blood sample. Perhaps this person had a  
263 combination of relative active lifestyle and excellent beta-cell function, resulting in  
264 absence of diabetes. Additionally, T2DM is a multifactorial disease in which both genetic  
265 as environmental factors play a role. Another reason why this individual carries the  
266 c.3614A>G variant but was not diagnosed with T2DM might be reduced penetrance. As  
267 often seen for multifactorial diseases with a heritable component, the c.3614A>G variant  
268 may have reduced penetrance, meaning that some individuals fail to express the trait, even  
269 though they carry the allele. The degree of penetrance is difficult to determine and is often  
270 age related. Given that the onset of symptoms in T2DM are age related and affected by  
271 both genetic as well as environmental factors such as nutrition, it is possible that this  
272 individual will develop the disease in the near future, although he is currently older than  
273 the age at which the diabetes was diagnosed in his brothers.

274         Although we cannot exclude the variant located in *ASXL1* as a candidate, the  
275 evidence for *PTPRF* as a candidate gene for T2DM is more convincing. Our finding that  
276 a genetic variant within *PTPRF* may be involved in the pathogenesis of type 2 diabetes is

277 supported by earlier studies. Miscio and co-workers investigated whether common  
278 polymorphisms within the *PTPRF* gene were associated with insulin resistance. They  
279 identified a single nucleotide polymorphism (SNP) within the promoter region (-127T>A;  
280 rs3001722) in which the A allele (minor allele) was associated with lower body mass  
281 index (BMI), waist circumference and mean blood pressure in a cohort of 589 unrelated  
282 non-diabetic subjects. In addition, the A allele was associated with lower triglycerides,  
283 glucose and insulin levels during an oral glucose tolerance test (oGTT) in an independent  
284 cohort of 307 unrelated non-diabetic individuals [21]. Menzaghi and co-workers report  
285 an association between the SNP 2518A>G (rs2782641), located within intron 3, and  
286 coronary artery disease (CAD) in a T2DM patient cohort including 592 individuals [22].  
287 To our knowledge, the c.3614A>G variant has not been reported in literature in relation  
288 to T2DM. These studies, together with our results, suggest that genetic variants within  
289 *PTPRF* are contributing to insulin resistance and T2DM in at least a subpopulation of  
290 patients.

291 *PTPRF* is a receptor-type transmembrane protein tyrosine phosphatase (PTPase)  
292 that is expressed in several insulin target tissues [23]. It physically interacts with the  
293 insulin receptor and dephosphorylates its tyrosine-kinase domain thereby inhibiting  
294 insulin signaling [24]. Transgenic mice overexpressing *PTPRF* are insulin resistant [25]  
295 and, conversely, *PTPRF* knock-out mice are characterized by increased insulin sensitivity  
296 [26]. *PTPRF* is therefore a potential candidate gene for insulin resistance. Regarding  
297 *ASXLI*, no studies were reported showing evidence that *ASXLI* is involved in the  
298 pathogenesis of T2DM.

299 Most studies investigating the genetic background of T2DM are focusing on  
300 identifying common variants that are associated with the disease [8, 27-29]. However,

301 most studies have not been particularly successful in discovering new disease genes. As  
302 a consequence, the rare variant hypothesis [30, 31], which states that rare variants with  
303 large effects are the primary drivers of common diseases, has received renewed attention.  
304 Studies investigating Mendelian diseases have demonstrated that a family-based  
305 approach is a good method to detect these rare variants with relatively high impact on  
306 disease [32]. Rare variants are not present in the general population at any reasonable  
307 frequency and an advantage of a family-based study is that more observations of a rare  
308 variant can be made in large families. However, type 2 diabetes is a late-onset disease and  
309 recruiting such families is challenging. We identified this family because of the unusual  
310 phenotype of the index patient, and noted the familial existence of the combination of  
311 severe insulin resistance and “isolated” hypertriglyceridemia: hypertriglyceridemia in the  
312 absence of hypercholesterolemia. As expected, hypertriglyceridemia was associated with  
313 decreased HDL-cholesterol levels. In this study, we used the family-based approach  
314 combined with whole-exome sequencing to detect variants that may have a role in  
315 susceptibility for the disease in this family. We were able to identify a rare variant located  
316 in a strong T2DM candidate gene, which suggests that the family-based approach  
317 combined with whole-exome sequencing may be a useful strategy to investigate the  
318 genetic background of type 2 diabetes.

319 While our findings suggest that the c.3614A>G variant in *PTPRF* may underly  
320 the phenotype of the this family, we were unable to identify a second family within our  
321 facility that resembles the disease characteristics observed in this first family, despite  
322 sharing this as a candidate gene via genematcher.com [33, 34]. In addition, no variants in  
323 *PTPRF* were identified in a patient cohort of 24 unrelated T2DM patients who  
324 phenotypically matched the characteristics of the affected family members. Our study

325 lacks confirmation through functional studies, which should be included in future  
326 investigations. We realize that it is possible that the identified variant is a false positive  
327 result. However, we would like to stress that the variant in *PTPRF* was identified using  
328 an unbiased, non-candidate gene driven, whole exome-wide approach and that the gene  
329 is known to be involved in insulin signaling and associated with metabolic disturbances.  
330 To our opinion, this suggests that *PTPRF* is a potential candidate gene that, at least,  
331 should be added to the discussion regarding genetic variants underlying T2DM. In that  
332 light, it might be best to see this report as a case report providing researchers and  
333 clinicians the opportunity to respond and set up collaborations in order to identify  
334 additional cases/families.

335         In summary, we applied whole-exome sequencing to identify genetic variants  
336 possibly involved in T2DM disease susceptibility in a family with highly aggregated type  
337 2 diabetes. Our results suggest that the c.3614A>G variant in the *PTPRF* gene play a role  
338 in an unusual T2DM subtype that is characterized by a severe insulin resistance and  
339 isolated hypertriglyceridemia. These results indicate that combining the family-based  
340 approach with whole-exome sequencing may be a useful strategy to further unravel the  
341 genetic background of type 2 diabetes. The genetic variant identified within this study  
342 represents a promising candidate for stratification of T2DM patients regarding mild or  
343 severe insulin resistance. Follow-up studies are needed to confirm that the identified  
344 variant in the *PTPRF* gene is indeed responsible for severe insulin resistance and isolated  
345 hypertriglyceridemia and to further unravel the precise working mechanism responsible  
346 for this unusual T2DM phenotype. If several independent studies are able to confirm our  
347 initial results, this genetic variant may have additional value for diagnosis and to optimize



348 treatment strategies in patients with this unusual T2DM subtype that is characterized by  
349 severe insulin resistance and isolated hypertriglyceridemia.

350 **List of abbreviations**

351

352 ALAT: alanine aminotransferase, ASAT: Aspartaat-aminotransferase, BMI: body mass  
353 index, CAD: coronary artery disease, GP: general practitioner, GWAS: genome-wide  
354 association study, HbA1c: hemoglobin A1c, HDL: high-density lipoprotein, LDL: low-  
355 density lipoprotein, oGTT: oral glucose tolerance test, PCR: polymerase chain reaction,  
356 PPI: protein-protein interaction, SNP: single nucleotide polymorphism, SU:  
357 Sulphonylureas, T2DM: Type 2 diabetes mellitus, TG: triglycerides

358

359 **Acknowledgements**

360

361 The authors would like to thank Lisenka E.L.M. Vissers, Petra de Vries, Marloes  
362 Steehouwer and Christian Gilissen for their help and advice during this study. The  
363 authors are very grateful to the patients and family members who made it possible to  
364 perform this study.

365

366 **Funding**

367 E.T. was supported by an EFSD/Novo Nordisk research grant provided by the European  
368 Foundation for the Study of Diabetes (EFSD) and by a grant of the Else-Kröner-  
369 Fresenius-Stiftung.

370

371 **Conflicts of interests**

372 None declared

373

374 **Declarations**

375

376 *Ethics approval and consent to participate*

377 The authors state that they have obtained appropriate institutional review board approval  
378 or have followed the principles outlined in the Declaration of Helsinki for all human or  
379 animal experimental investigations. All family members were informed about the goal of  
380 the study and consented to participation. Study was approved by the The local Medical  
381 Ethical Committee, Commissie Mensgebonden Onderzoek (CMO) regio Arnhem-  
382 Nijmegen.

383

384 *Consent for publication*

385 Consent to publish was obtained from all individuals.

386

387 *Availability of data and material*

388 Please contact author for data requests

389

390

391

392

393

394

395

396

397

398 **References**

- 399 1. Kaprio, J., et al., *Concordance for type 1 (insulin-dependent) and type 2 (non-*  
400 *insulin-dependent) diabetes mellitus in a population-based cohort of twins in*  
401 *Finland*. *Diabetologia*, 1992. **35**(11): p. 1060-7.
- 402 2. *Diabetes mellitus in twins: a cooperative study in Japan*. *Committee on Diabetic*  
403 *Twins, Japan Diabetes Society*. *Diabetes Res Clin Pract*, 1988. **5**(4): p. 271-80.
- 404 3. O'Rahilly, S., I. Barroso, and N.J. Wareham, *Genetic factors in type 2 diabetes:*  
405 *the end of the beginning?* *Science*, 2005. **307**(5708): p. 370-3.
- 406 4. Witka, B.Z., et al., *Type 2 Diabetes-Associated Genetic Polymorphisms as*  
407 *Potential Disease Predictors*. *Diabetes Metab Syndr Obes*, 2019. **12**: p. 2689-  
408 2706.
- 409 5. Fuchsberger, C., et al., *The genetic architecture of type 2 diabetes*. *Nature*, 2016.  
410 **536**(7614): p. 41-47.
- 411 6. Moltke, I., et al., *A common Greenlandic TBC1D4 variant confers muscle insulin*  
412 *resistance and type 2 diabetes*. *Nature*, 2014. **512**(7513): p. 190-3.
- 413 7. Flannick, J., et al., *Exome sequencing of 20,791 cases of type 2 diabetes and*  
414 *24,440 controls*. *Nature*, 2019. **570**(7759): p. 71-76.
- 415 8. Morris, A.P., et al., *Large-scale association analysis provides insights into the*  
416 *genetic architecture and pathophysiology of type 2 diabetes*. *Nat Genet*, 2012.  
417 **44**(9): p. 981-90.
- 418 9. Lohmueller, K.E., et al., *Whole-exome sequencing of 2,000 Danish individuals*  
419 *and the role of rare coding variants in type 2 diabetes*. *Am J Hum Genet*, 2013.  
420 **93**(6): p. 1072-86.

- 421 10. Holm, H., et al., *A rare variant in MYH6 is associated with high risk of sick sinus*  
422 *syndrome*. Nat Genet, 2011. **43**(4): p. 316-20.
- 423 11. Ng, S.B., et al., *Exome sequencing identifies the cause of a mendelian disorder*.  
424 Nat Genet, 2010. **42**(1): p. 30-5.
- 425 12. Samocha, K.E., et al., *A framework for the interpretation of de novo mutation in*  
426 *human disease*. Nat Genet, 2014.
- 427 13. Bernier, R., et al., *Disruptive CHD8 Mutations Define a Subtype of Autism Early*  
428 *in Development*. Cell, 2014. **158**(2): p. 263-76.
- 429 14. Grarup, N., et al., *Genetic susceptibility to type 2 diabetes and obesity: from*  
430 *genome-wide association studies to rare variants and beyond*. Diabetologia, 2014.  
431 **57**(8): p. 1528-41.
- 432 15. Van't, R.E., et al., *The Diabetes Pearl: Diabetes biobanking in The Netherlands*.  
433 BMC.Public Health, 2012. **12**: p. 949.
- 434 16. Hoischen, A., et al., *De novo mutations of SETBP1 cause Schinzel-Giedion*  
435 *syndrome*. Nat Genet, 2010. **42**(6): p. 483-5.
- 436 17. van, d., V, et al., *STAT1 mutations in autosomal dominant chronic mucocutaneous*  
437 *candidiasis*. N.Engl.J.Med., 2011. **365**(1): p. 54-61.
- 438 18. Franceschini, A., et al., *STRING v9.1: protein-protein interaction networks, with*  
439 *increased coverage and integration*. Nucleic Acids Res, 2013. **41**(Database  
440 issue): p. D808-15.
- 441 19. Genomes Project, C., et al., *A map of human genome variation from population-*  
442 *scale sequencing*. Nature, 2010. **467**(7319): p. 1061-73.
- 443 20. Hashimoto, N., et al., *Insulin receptor protein-tyrosine phosphatases. Leukocyte*  
444 *common antigen-related phosphatase rapidly deactivates the insulin receptor*

- 445        *kinase by preferential dephosphorylation of the receptor regulatory domain. J*  
446        *Biol Chem*, 1992. **267**(20): p. 13811-4.
- 447    21.    Miscio, G., et al., *The allelic variant of LAR gene promoter -127 bp T-->A is*  
448        *associated with reduced risk of obesity and other features related to insulin*  
449        *resistance. J Mol Med (Berl)*, 2004. **82**(7): p. 459-66.
- 450    22.    Menzaghi, C., et al., *The protein tyrosine phosphatase receptor type f (PTPRF)*  
451        *locus is associated with coronary artery disease in type 2 diabetes. J Intern Med*,  
452        2008. **263**(6): p. 653-4.
- 453    23.    Tsujikawa, K., et al., *Distinct functions of the two protein tyrosine phosphatase*  
454        *domains of LAR (leukocyte common antigen-related) on tyrosine*  
455        *dephosphorylation of insulin receptor. Mol Endocrinol*, 2001. **15**(2): p. 271-80.
- 456    24.    Goldstein, B.J., et al., *Regulation of the insulin signalling pathway by cellular*  
457        *protein-tyrosine phosphatases. Mol Cell Biochem*, 1998. **182**(1-2): p. 91-9.
- 458    25.    Zabolotny, J.M., et al., *Overexpression of the LAR (leukocyte antigen-related)*  
459        *protein-tyrosine phosphatase in muscle causes insulin resistance. Proc Natl Acad*  
460        *Sci U S A*, 2001. **98**(9): p. 5187-92.
- 461    26.    Ren, J.M., et al., *Transgenic mice deficient in the LAR protein-tyrosine*  
462        *phosphatase exhibit profound defects in glucose homeostasis. Diabetes*, 1998.  
463        **47**(3): p. 493-7.
- 464    27.    Replication, D.I.G., et al., *Genome-wide trans-ancestry meta-analysis provides*  
465        *insight into the genetic architecture of type 2 diabetes susceptibility. Nat Genet*,  
466        2014. **46**(3): p. 234-44.

- 467 28. Albrechtsen, A., et al., *Exome sequencing-driven discovery of coding*  
468 *polymorphisms associated with common metabolic phenotypes*. *Diabetologia*,  
469 2013. **56**(2): p. 298-310.
- 470 29. Manning, A.K., et al., *A genome-wide approach accounting for body mass index*  
471 *identifies genetic variants influencing fasting glycemic traits and insulin*  
472 *resistance*. *Nat Genet*, 2012. **44**(6): p. 659-69.
- 473 30. Bodmer, W. and C. Bonilla, *Common and rare variants in multifactorial*  
474 *susceptibility to common diseases*. *Nat Genet*, 2008. **40**(6): p. 695-701.
- 475 31. Pritchard, J.K. and N.J. Cox, *The allelic architecture of human disease genes:*  
476 *common disease-common variant...or not?* *Hum Mol Genet*, 2002. **11**(20): p.  
477 2417-23.
- 478 32. Saad, M. and E.M. Wijsman, *Power of family-based association designs to detect*  
479 *rare variants in large pedigrees using imputed genotypes*. *Genet Epidemiol*, 2014.  
480 **38**(1): p. 1-9.
- 481 33. Sobreira, N., et al., *GeneMatcher: a matching tool for connecting investigators*  
482 *with an interest in the same gene*. *Hum Mutat*, 2015. **36**(10): p. 928-30.
- 483 34. Sobreira, N., et al., *New tools for Mendelian disease gene identification: PhenoDB*  
484 *variant analysis module; and GeneMatcher, a web-based tool for linking*  
485 *investigators with an interest in the same gene*. *Hum Mutat*, 2015. **36**(4): p. 425-  
486 31.

487

488

489 **Tabel 1.** Characteristics of family members

| Family member | Phenotype        |              |     |          |                          |                     |                            |                        |                          |                          |
|---------------|------------------|--------------|-----|----------|--------------------------|---------------------|----------------------------|------------------------|--------------------------|--------------------------|
|               | Diabetes         | AGE of ONSET | HT  | AGE      | BMI (kg/m <sup>2</sup> ) | Insulin dose (U/kg) | Total Cholesterol (mmol/l) | Triglycerides (mmol/l) | HDL-cholesterol (mmol/l) | LDL-Cholesterol (mmol/l) |
| 1             | Yes              | 60s          | Yes | 80s†     | 27                       | 1.9                 | 4.4 - 4.7                  | 3.6 – 4.7              | 0.6                      | 2.2                      |
| 2             | No               |              | Yes | Late 80s | 35                       | N/A                 | 4.9                        | 2.5                    | 0.8                      | 3.0                      |
| 3             | Yes <sup>#</sup> | 20s          | Yes | Late 50s | 19                       | 1.0                 | 3.7                        | 4.4 (max 25)           | 0.8                      | 1.0                      |
| 4             | Yes              | Late 30s     | Yes | Late 50s | 31                       | 1.6                 | 5.3                        | 4.9                    | 0.7                      | 2.5                      |
| 5             | No               |              | No  | 50s†     | ?                        | N/A                 |                            |                        |                          |                          |
| 6             | No               |              | Yes | 50s      | 27                       | N/A                 | 4.8                        | 1.9                    | 1.1                      | 2.9                      |
| 7             | Yes <sup>#</sup> | Late 30s     | Yes | 50s      | 27                       | 0.9                 | 4.5                        | 2.9                    | 0.9                      | 2.2                      |
| 8             | No               |              | No  | Late 40s | 30                       | N/A                 | 5.1                        | 3.4                    | 0.9                      | 2.7                      |

490 <sup>#</sup>denoted as type 1 diabetes but no auto-immunity tested; HT: hypertension; BMI: Body Mass Index

491 †Died at indicated age



492 **Table 2.** Overview of the 21 unique nonsynonymous variants present in both affected family members.

| Gene symbol         | Gene ID          | Chromosome   | Reference | Mutation | Start position  | End position    | Abberation          | Reference Amino Acid | Mutation Amino Acid | Conservation score |
|---------------------|------------------|--------------|-----------|----------|-----------------|-----------------|---------------------|----------------------|---------------------|--------------------|
| <i>PDLIM5</i>       | NM_006457        | chr4         | C         | T        | 95561564        | 95561564        | substitution        | R                    | *                   | 1.933              |
| <i>PARP6</i>        | NM_020214        | chr15        | G         | A        | 72553972        | 72553972        | substitution        | H                    | Y                   | 9.711              |
| <i>KTN1</i>         | NM_004986        | chr14        | C         | T        | 56094742        | 56094742        | substitution        | T                    | I                   | 3.371              |
| <i>NEXN</i>         | NM_001172309     | chr1         | A         | G        | 78399073        | 78399073        | substitution        | E                    | G                   | 8.789              |
| <i>PCNX</i>         | NM_014982        | chr14        | C         | T        | 71428992        | 71428992        | substitution        | P                    | S                   | 6.163              |
| <b><i>TTPRF</i></b> | <b>NM_002840</b> | <b>chr1</b>  | <b>A</b>  | <b>G</b> | <b>44072041</b> | <b>44072041</b> | <b>substitution</b> | <b>N</b>             | <b>S</b>            | <b>-0.606</b>      |
| <i>NPR1</i>         | NM_000906        | chr1         | T         | C        | 153660586       | 153660586       | substitution        | L                    | P                   | 1.801              |
| <i>DCAF8</i>        | NM_015726        | chr1         | T         | G        | 160209533       | 160209533       | substitution        | Q                    | P                   | 0.727              |
| <i>C10orf128</i>    | NM_001288742     | chr10        | G         | A        | 50364232        | 50364232        | substitution        | S                    | L                   | -0.062             |
| <i>PYROXD1</i>      | NM_024854        | chr12        | A         | G        | 21602560        | 21602560        | substitution        | K                    | E                   | 5.191              |
| <i>POLR2A</i>       | NM_000937        | chr17        | A         | G        | 7417024         | 7417024         | substitution        | Q                    | R                   | 1.397              |
| <i>CHD3</i>         | NM_001005271     | chr17        | T         | C        | 7810699         | 7810699         | substitution        | L                    | P                   | 0.563              |
| <i>PARD3B</i>       | NM_152526        | chr2         | C         | G        | 206480223       | 206480223       | substitution        | R                    | G                   | 3.724              |
| <i>LANCL1</i>       | NM_001136574     | chr2         | A         | C        | 211306083       | 211306083       | substitution        | F                    | L                   | 2.365              |
| <b><i>ASXL1</i></b> | <b>NM_015338</b> | <b>chr20</b> | <b>C</b>  | <b>T</b> | <b>31019407</b> | <b>31019407</b> | <b>substitution</b> | <b>R</b>             | <b>C</b>            | <b>4.337</b>       |
| <i>PRMT2</i>        | NM_001242865     | chr21        | C         | T        | 48071838        | 48071838        | substitution        | L                    | F                   | -0.331             |
| <i>GOLIM4</i>       | NM_014498        | chr3         | C         | T        | 167728086       | 167728086       | substitution        | E                    | K                   | 3.176              |
| <i>GTPBP2</i>       | NM_019096        | chr6         | C         | A        | 43591700        | 43591700        | substitution        | E                    | D                   | 0.073              |
| <i>MATN2</i>        | NM_002380        | chr8         | T         | C        | 98991158        | 98991158        | substitution        | C                    | R                   | 6.292              |
| <i>PRUNE2</i>       | NM_015225        | chr9         | G         | A        | 79267561        | 79267561        | substitution        | R                    | W                   | 1.445              |
| <i>AKNA</i>         | NM_030767        | chr9         | C         | T        | 117139699       | 117139699       | substitution        | G                    | R                   | -0.126             |

493 \*stop mutation; conservation score: PhyloP; measures acceleration (faster evolution than expected under neutral drift) as well as  
494 conservation (slower than expected evolution). The absolute values of the scores represent  $-\log$  p-values under a null hypothesis of neutral  
495 evolution.

496 **Table 3.** Segregation of the 21 identified variants in all family members.

| Gene symbol      | Family member |              |          |          |              |              |          |              |
|------------------|---------------|--------------|----------|----------|--------------|--------------|----------|--------------|
|                  | 1             | 2            | 3        | 4        | 5            | 6            | 7        | 8            |
|                  | Affected      | Not affected | Affected | Affected | Not affected | Not affected | Affected | Not affected |
| <i>NFR1</i>      | AG            | AA           | AA       | AG       | AA           | AG           | AA       | AA           |
| <i>DCAF8</i>     | TT            | -            | -        | TT       | -            | -            | -        | -            |
| <i>C10orf128</i> | GA            | GG           | GG       | GA       | GA           | GG           | GG       | GG           |
| <i>PYROXD1</i>   | AG            | AA           | AG       | AG       | AA           | AA           | AA       | AA           |
| <i>POLR2A</i>    | AG            | AA           | AA       | AG       | AA           | AG           | AA       | AA           |
| <i>CHD3</i>      | TC            | TT           | TT       | TC       | TT           | TC           | TT       | TT           |
| <i>PARD3B</i>    | CG            | CC           | CG       | CG       | CG           | CG           | CG       | CC           |
| <i>LANCL1</i>    | AC            | AA           | AC       | AC       | AC           | AC           | AC       | AA           |
| <i>ASXL1</i>     | CT            | CC           | CT       | CT       | CC           | CT           | CT       | CC           |
| <i>PRMT2</i>     | CT            | CC           | CC       | CT       | CT           | CC           | CC       | CT           |
| <i>GOLIM4</i>    | CT            | CC           | CT       | CT       | CT           | CT           | CT       | CT           |
| <i>GTPBP2</i>    | CC            | -            | -        | CC       | -            | -            | -        | -            |
| <i>MATN2</i>     | TC            | TT           | TC       | TC       | TC           | TT           | TT       | TC           |
| <i>PRUNE2</i>    | GA            | GG           | GG       | GA       | GA           | GA           | GA       | GA           |
| <i>AKNA</i>      | CT            | CC           | CC       | CT       | CT           | CT           | CT       | CC           |
| <i>PDLIM5</i>    | CT            | CC           | CC       | CT       | CC           | CC           | CT       | CT           |
| <i>PARP6</i>     | GA            | GG           | GG       | GA       | GA           | GA           | GG       | GA           |
| <i>KTNI</i>      | CT            | CC           | CT       | CT       | CT           | CC           | CT       | CT           |
| <i>NEXN</i>      | AG            | AA           | AG       | AG       | AG           | AA           | AG       | AG           |
| <i>PCNX</i>      | CT            | CC           | CC       | CT       | CT           | CC           | CT       | CT           |
| <i>PTPRF</i>     | AG            | AA           | AG       | AG       | AA           | AG           | AG       | AA           |

497 Exome sequencing was performed on genomic DNA of two family members. Segregation of the identified variants in family members was  
498 investigated by the use of Sanger sequencing. The variants that were identified with exome sequencing in *DCAF8* and *GTPBP2* could not be  
499 confirmed by Sanger sequencing in the family members. Therefore, Sanger sequencing for these variants in the rest of the family members  
500 was not performed. Family members that were diagnosed with diabetes (affected) are indicated in grey.

501 **Table 4.** Predicted interaction partners for *PTPRF* and *ASXL1*.

| <i>PTPRF</i>  |                                                                                                                                                                                                                                                                                                                                              |                  |
|---------------|----------------------------------------------------------------------------------------------------------------------------------------------------------------------------------------------------------------------------------------------------------------------------------------------------------------------------------------------|------------------|
| Gene symbol   | Gene name and function                                                                                                                                                                                                                                                                                                                       | Confidence score |
| <i>PPFIA1</i> | Protein tyrosine phosphatase, receptor type, f polypeptide (PTPRF), interacting protein (liprin), alpha 1. Binds to the intracellular membrane-distal phosphatase domain of PTPRF. This interaction may regulate the disassembly of focal adhesion and thus help orchestrate cell-matrix interactions.                                       | 0.950            |
| <i>INSR</i>   | Insulin receptor. Binding of insulin to this receptor stimulates glucose uptake. Inhibiting/disrupting of insulin binding to <i>INSR</i> results in insulin resistance and T2DM. Polymorphisms within this gene are associated with insulin resistance and T2DM.                                                                             | 0.913            |
| <i>LRFN4</i>  | Leucine rich repeat and fibronectin type III domain containing 4; Promotes neurite outgrowth in hippocampal neurons                                                                                                                                                                                                                          | 0.910            |
| <i>CTNNB1</i> | Catenin (cadherin-associated protein), beta 1. The protein encoded by this gene is part of a complex of proteins that constitute adherens junctions (AJs). AJs are necessary for the creation and maintenance of epithelial cell layers by regulating cell growth and adhesion between cells                                                 | 0.889            |
| <i>IRS1</i>   | Insulin receptor substrate 1. Located downstream of <i>INSR</i> in the insulin signaling pathway. Insulin activates <i>INSR</i> , which phosphorylates and recruits different substrate adaptors such as the IRS family of proteins. Mutations in <i>IRS</i> genes are associated with T2DM and susceptibility to insulin resistance.        | 0.884            |
| <i>IRS2</i>   | Insulin receptor substrate 2. Located downstream of <i>INSR</i> in the insulin signaling pathway. Insulin activates <i>INSR</i> , which phosphorylates and recruits different substrate adaptors such as the IRS family of proteins. Mutations in <i>IRS</i> genes are associated with T2DM and susceptibility to insulin resistance.        | 0.876            |
| <i>MAPK1</i>  | Mitogen-activated protein kinase 1; Serine/threonine kinase which acts as an essential component of the MAP kinase signal transduction pathway. Pathway mediates diverse biological functions such as cell growth, adhesion, survival and differentiation through the regulation of transcription, translation, cytoskeletal rearrangements. | 0.857            |
| <i>PTPN1</i>  | Protein tyrosine phosphatase, non-receptor type 1; Tyrosine-protein phosphatase which acts as a regulator of endoplasmic reticulum unfolded protein response                                                                                                                                                                                 | 0.838            |
| <i>LRRC4B</i> | Leucine rich repeat containing 4B; Synaptic adhesion protein. Regulates the formation of excitatory synapses                                                                                                                                                                                                                                 | 0.831            |
| <i>PARL</i>   | Presenilin associated, rhomboid-like; Required for the control of apoptosis during postnatal growth                                                                                                                                                                                                                                          | 0.829            |
| <i>ASXL1</i>  |                                                                                                                                                                                                                                                                                                                                              |                  |
| <i>BAP1</i>   | BRCA1 associated protein-1 (ubiquitin carboxy-terminal hydrolase); Deubiquitinating enzyme that plays a key role in chromatin by mediating deubiquitination of histone H2A and HCFC1. Acts as a regulator of cell growth.                                                                                                                    | 0.980            |
| <i>EZH2</i>   | Enhancer of zeste 2 polycomb repressive complex 2 subunit. Family members form multimeric protein complexes, which are involved in maintaining the transcriptional repressive state of genes over successive cell generations. This protein may play a role in the hematopoietic and central nervous systems                                 | 0.979            |
| <i>HCFC1</i>  | Host cell factor C1 (VP16-accessory protein); Involved in control of the cell cycle. Regulation of transcription                                                                                                                                                                                                                             | 0.956            |

|              |                                                                                                                                                                                                                                                                                                                                                                                                                  |       |
|--------------|------------------------------------------------------------------------------------------------------------------------------------------------------------------------------------------------------------------------------------------------------------------------------------------------------------------------------------------------------------------------------------------------------------------|-------|
| <i>SUZ12</i> | SUZ12, polycomb repressive complex 2 subunit. This zinc finger gene has been identified at the breakpoints of a recurrent chromosomal translocation reported in endometrial stromal sarcoma.                                                                                                                                                                                                                     | 0.952 |
| <i>UBC</i>   | ubiquitin C. The encoded protein is a polyubiquitin precursor. Conjugation of ubiquitin monomers or polymers can lead to various effects within a cell, depending on the residues to which ubiquitin is conjugated. Ubiquitination has been associated with protein degradation, DNA repair, cell cycle regulation, kinase modification, endocytosis, and regulation of other cell signaling pathways            | 0.946 |
| <i>FOKK2</i> | Forkhead box K2; Recognizes the core sequence 5'-TAAACA-3'. Binds to NFAT-like motifs (purine-rich) in the IL2 promoter. May be involved in both positive and negative regulation of important viral and cellular promoter elements                                                                                                                                                                              | 0.942 |
| <i>FOKK1</i> | Forkhead box K1; Transcriptional regulator that binds to the upstream enhancer region (CCAC box) of myoglobin gene. Has a role in myogenic differentiation and in remodeling processes of adult muscles that occur in response to physiological stimuli.                                                                                                                                                         | 0.940 |
| <i>OGT</i>   | O-linked N-acetylglucosamine (GlcNAc) transferase; Catalyzes the transfer of a single N-acetylglucosamine from UDP-GlcNAc to a serine or threonine residue in cytoplasmic and nuclear proteins.                                                                                                                                                                                                                  | 0.938 |
| <i>EZH1</i>  | Enhancer of zeste 1 polycomb repressive complex 2 subunit. EZH1 is a component of a noncanonical Polycomb repressive complex-2 (PRC2) that mediates methylation of histone H3 lys27 (H3K27) and functions in the maintenance of embryonic stem cell pluripotency and plasticity                                                                                                                                  | 0.935 |
| <i>EED</i>   | embryonic ectoderm development. This gene encodes a member of the Polycomb-group (PcG) family. PcG family members form multimeric protein complexes, which are involved in maintaining the transcriptional repressive state of genes over successive cell generations. This protein mediates repression of gene activity through histone deacetylation, and may act as a specific regulator of integrin function | 0.934 |

503 **Figure 1.** Protein-protein interaction (PPI) networks of *PTPRF* and *ASXL1*

504

505

506

507

508

509

510

511

512

513

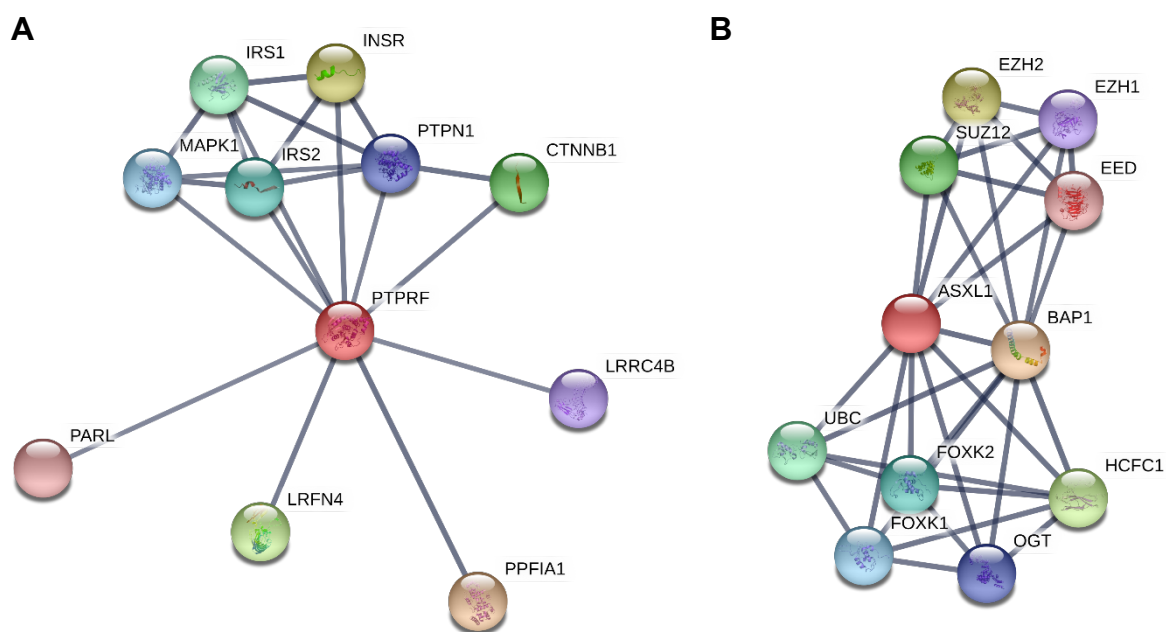

514 **Figure legends**

515

516 **Figure 1.** Protein-protein interaction (PPI) networks of *PTPRF* and *ASXLI*.

517 PPI networks of **(A)** *PTPRF* and **(B)** *ASXLI*. A confidence score is assigned to each  
518 interaction based upon direct (physical) and indirect (functional) associations.

519 Confidence score cut-off was  $\geq 0,7$  (high confidence)

520

521
